# Supplementary material for: Click reactions and intramolecular condensation reactions on azido-adamantyl-functionalized tin sulfide clusters
Source: Royal Society of Chemistry journal article supplement (doi:10.1039/c9qi00424f), 2019-01-01
Supplement: c9qi00424f1.pdf [file c9qi00424f1.pdf]

## SUPPORTING INFORMATION

### **Click Reactions and Intramolecular Condensation on Azido-Adamantyl-Functionalized Tin Sulfide Clusters**

Annikka Engel, Eike Dornsiepen and Stefanie Dehnen\*

Department of Chemistry and Wissenschaftliches Zentrum für Materialwissenschaften (WZMW),  
Philipps-Universität Marburg, Hans-Meerwein-Straße 4, 35037 Marburg, Germany.

#### **Table of Contents**

|                                          |   |
|------------------------------------------|---|
| I. General Remarks .....                 | 2 |
| II. Synthesis.....                       | 2 |
| III. Spectroscopy and spectrometry ..... | 5 |
| IV. Quantum Chemical Investigations..... | 9 |
| V. References .....                      | 9 |

## I. General Remarks

The reactions containing tin sulfide clusters were carried out under argon atmosphere with Schlenk techniques. Dry solvents were distilled prior to use and stored over 3 Å molecular sieve until use.

## II. Synthesis

### Synthesis of Compound **S1**:

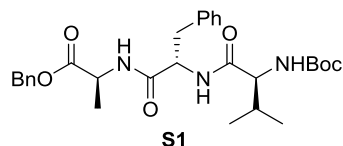

Tripeptide BnO-L-Ala-L-Phe-L-Val-Boc **S1** was synthesized according to liquid-phase peptide synthesis using following amounts: 1.73 g (8.00 mmol) BnO-L-Ala-H • HCl, 2.33 g (8.80 mmol) HO-L-Phe-Boc, and 1.91 g (8.80 mmol) HO-L-Val-Boc. Coupling sequences were performed by using 1.69 g (8.80 mmol) EDC • HCl, 1.35 g (8.80 mmol) HOBt, 1.22 mL (8.80 mmol) Et<sub>3</sub>N, and 50 mL CH<sub>2</sub>Cl<sub>2</sub>. Boc deprotections were realized using 16 mL (64.0 mmol) 8 M HCl in dioxane. After column chromatography (10 CH<sub>2</sub>Cl<sub>2</sub>/1 MeOH) 3.54 g (6.73 mmol, 84%) of a colorless solid were obtained.

**Yield:** 3.54 g (6.73 mmol, 84%).

**R<sub>f</sub>** (10 CH<sub>2</sub>Cl<sub>2</sub>/1 MeOH) = 0.88.

**<sup>1</sup>H-NMR (400 MHz, CDCl<sub>3</sub>):** δ/ppm = 7.41 – 7.29 (m, 5H), 7.27 – 7.16 (m, 5H), 6.56 (s, 2H), 5.14 (s, 2H), 4.93 (s, 1H), 4.71 (q, J = 6.9 Hz, 1H), 4.52 (p, J = 7.2 Hz, 1H), 3.90 (d, J = 6.6 Hz, 1H), 3.17 – 2.97 (m, 2H), 2.12 (dp, J = 13.6, 6.8 Hz, 1H), 1.41 (s, 9H), 1.33 (d, J = 7.2 Hz, 3H), 0.90 (d, J = 6.8 Hz, 3H), 0.80 (d, J = 6.4 Hz, 3H).

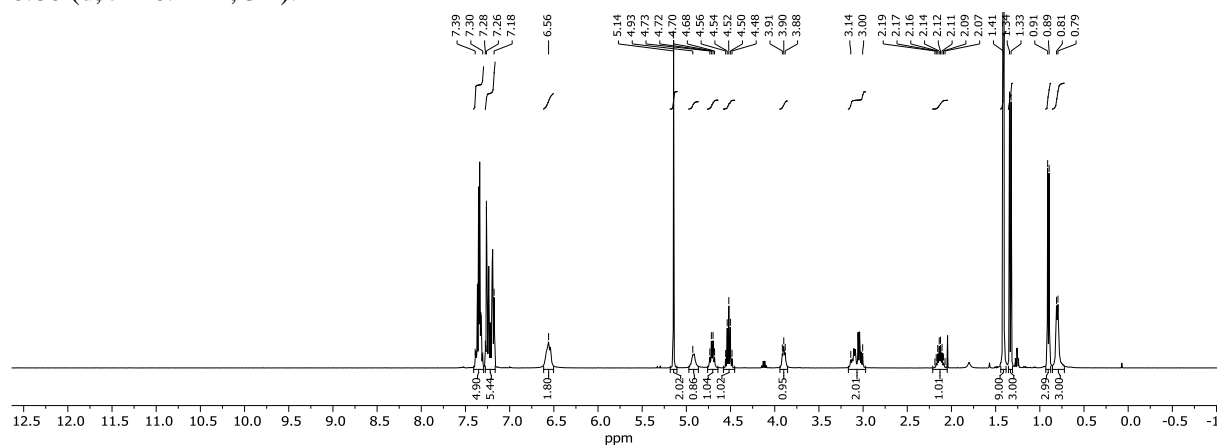

**<sup>13</sup>C-NMR (101 MHz, CDCl<sub>3</sub>):** δ/ppm = 172.2, 171.5, 170.2, 156.0, 136.4, 135.5, 129.4 (2C), 128.8 (2C), 128.7 (2C), 128.5, 128.3 (2C), 127.2, 80.3, 67.2, 60.3, 54.1, 48.5, 38.1, 30.6, 28.4 (3C), 19.4, 18.2, 17.5.



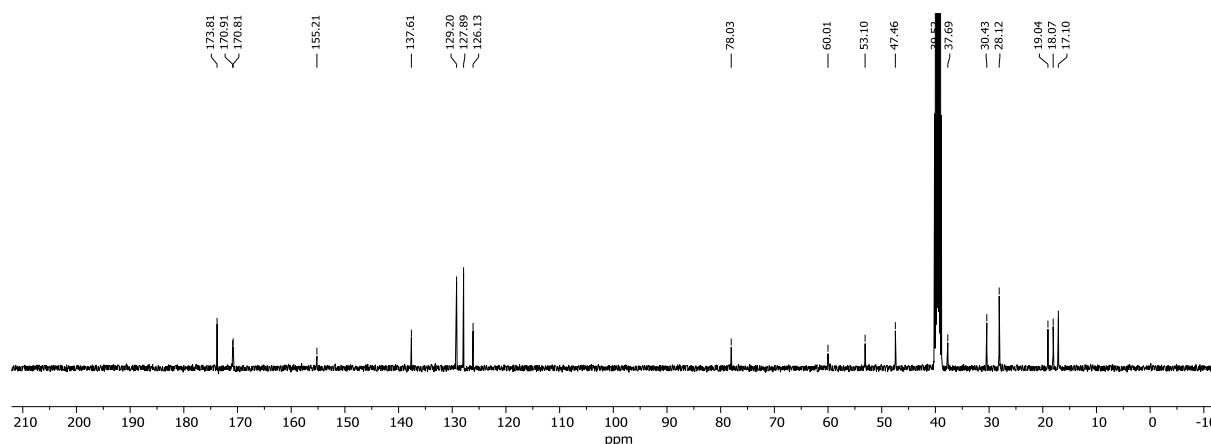

### Synthesis of Compound **3**:

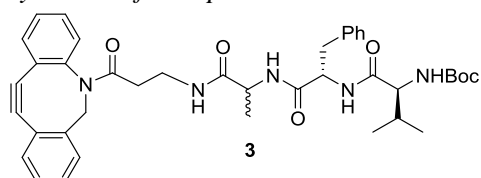

0.100 g (0.394 mmol) dibenzocyclooctyne-amine, 0.206 g (0.473 mmol) **S2**, 0.091 g (0.473 mmol) EDC • HCl, 0.073 g (0.473 mmol) HOBt, 0.062 mL (0.473 mmol) Et<sub>3</sub>N, and 10 mL CH<sub>2</sub>Cl<sub>2</sub> stirred over night at 25 °C. The reaction solution was concentrated and the crude product was purified by column chromatography (1 *n*-Hexane / 1 EtOAc → 10 CH<sub>2</sub>Cl<sub>2</sub>/1 MeOH). 0.273 g (0.393 mmol, >99%) of a colorless solid were obtained. Note: As indicated for structure **3** the stereogenic center of alanine epimerizes under the employed conditions.

**Yield:** 0.273 g (0.393 mmol, >99%).

**<sup>1</sup>H-NMR (400 MHz, CDCl<sub>3</sub>):** δ/ppm = 7.66 (d, *J* = 7.3 Hz, 1H), 7.41 – 7.09 (m, 13H), 6.81 (br s, 0.5H), 6.75 – 6.68 (m, 1.5H), 6.56 (br s, 0.5H), 6.45 (br s, 0.5H), 5.14 (dd, *J* = 13.9, 3.0 Hz, 1H), 5.10 – 5.00 (m, 1H), 4.64 (s, 1H), 4.38 – 4.23 (m, 1H), 3.86 (q, *J* = 5.9 Hz, 1H), 3.66 (d, *J* = 13.8 Hz, 1H), 3.39 – 3.17 (m, 2H), 3.03 (dd, *J* = 13.6, 6.7 Hz, 2H), 2.50 (d, *J* = 29.3 Hz, 1H), 2.07 – 2.00 (m, 1H), 1.38 (d, *J* = 1.7 Hz, 9H), 1.20 (d, *J* = 7.0 Hz, 1.5 H), 1.10 (d, *J* = 7.0 Hz, 1.5H), 0.88 (dd, *J* = 6.8, 3.9 Hz, 3H), 0.83 – 0.76 (m, 3H).

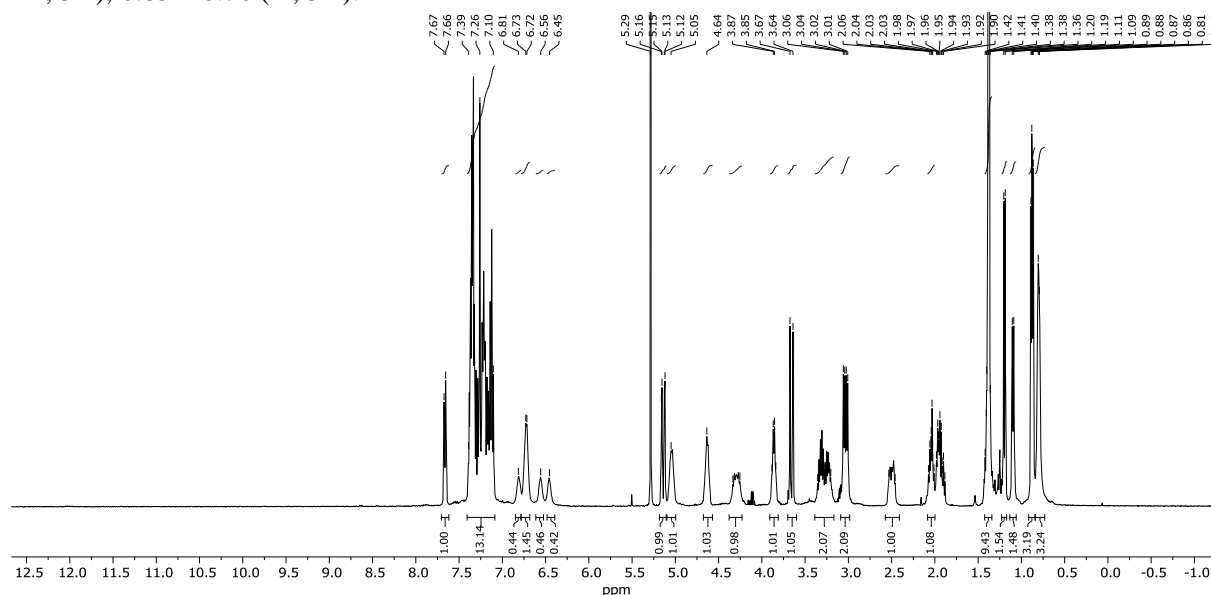

The  $^{13}\text{C}$ -NMR spectrum shows up to 10 signals which accord to different amid bonds. These signals are obtained as a result of the epimerization of the peptide during the synthesis, which inhibits proper assignment of the peaks.

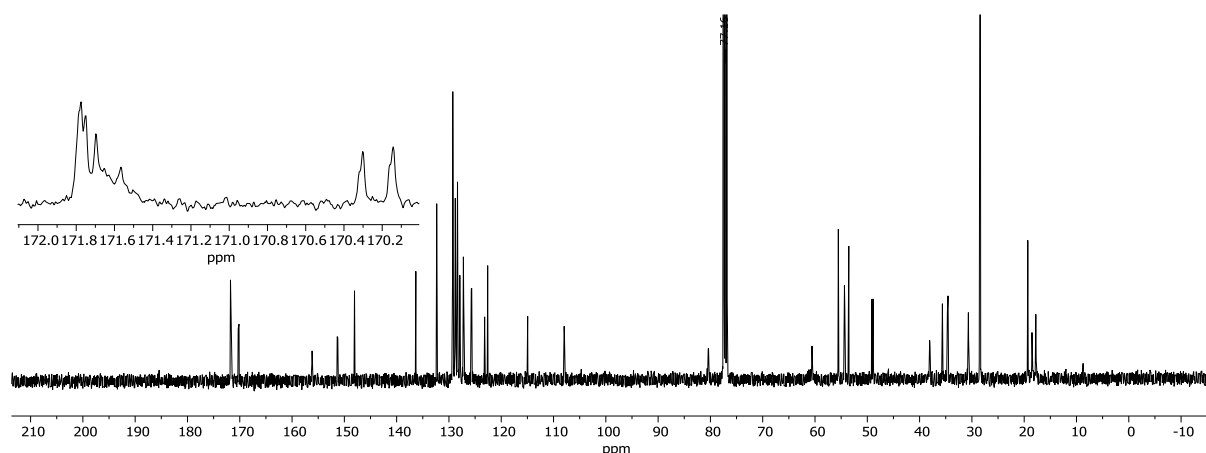

#### *Synthesis of Compound 1:*

0.086 g (0.0585 mmol, 1.0 eq) of compound **D** and 0.048 g (0.176 mmol, 3.0 eq) azadibenzocyclooctyne-amine **E** were dissolved in 1.5 mL  $\text{CH}_2\text{Cl}_2$  respectively. The solutions were combined and stirred for 18 h at room temperature. The solvent was removed *in vacuo* and a light yellow powder was obtained.

$^{119}\text{Sn}$  NMR (187 MHz,  $\text{CDCl}_3$ ):  $\delta/\text{ppm} = -80$ .

Due to very poor solubility and a presumably high mobility of the substituents we were not able to detect all three chemically different tin atoms, but the signal is shifted downfield with respect to the precursor ( $-103$  ppm),<sup>[6]</sup> hence indicating that the reaction took place.

HRMS (ESI+):  $m/z = 1751.3503$   $[\text{M}-\text{Cl}]^+$  (calc. for  $[\text{C}_{76}\text{H}_{93}\text{N}_{14}\text{O}_4\text{S}_4\text{Sn}_3]^+$  (**1**<sup>+</sup>)  $m/z = 1751.3468$ ).

#### *Synthesis of Compound 2:*

0.049 g (0.0715 mmol, 3.0 eq) peptide substituted alkyne **3** were dissolved in 4.0 mL  $\text{CH}_2\text{Cl}_2$  and added to 0.035 g (0.0238 mmol, 1.0 eq) of compound **D**. The solution was stirred at room temperature for 16 h. Afterwards the solvent was removed *in vacuo* and a light yellow powder was obtained.

$^{119}\text{Sn}$  NMR (187 MHz,  $\text{CDCl}_3$ ):  $\delta/\text{ppm} = -63, -96$ .

HRMS (ESI+):  $m/z = 2820.9427$  (calc. for  $[\text{C}_{131}\text{H}_{172}\text{N}_{24}\text{O}_{15}\text{S}_4\text{Sn}_3]^+$  (**2**<sup>+</sup>)  $m/z = 2820.9447$ ).

### III. Spectroscopy and spectrometry

**NMR spectroscopy:**  $^{119}\text{Sn}$  NMR spectra of the substituted tin sulfide clusters were carried out using a Bruker Avance III at 298 K. Chemical shifts ( $\delta$ ) are given in ppm relative to the respective solvent residual peaks:  $\text{CDCl}_3$   $\delta = 7.26$  and  $77.16$  ppm;  $\text{DMSO}-d_6$   $\delta = 2.50$  and  $39.52$  ppm.

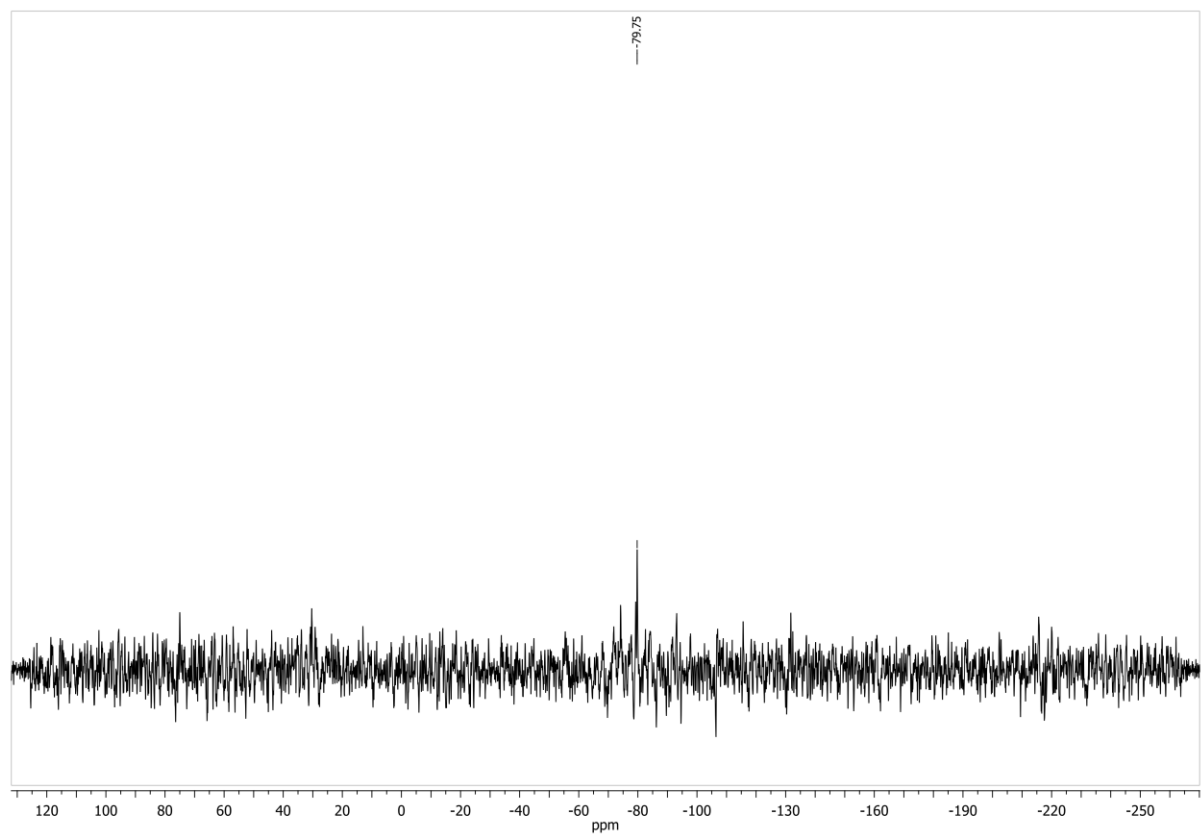

**Figure S1.**  $^{119}\text{Sn}$  NMR spectrum of compound **1·Cl** in  $\text{CDCl}_3$ .

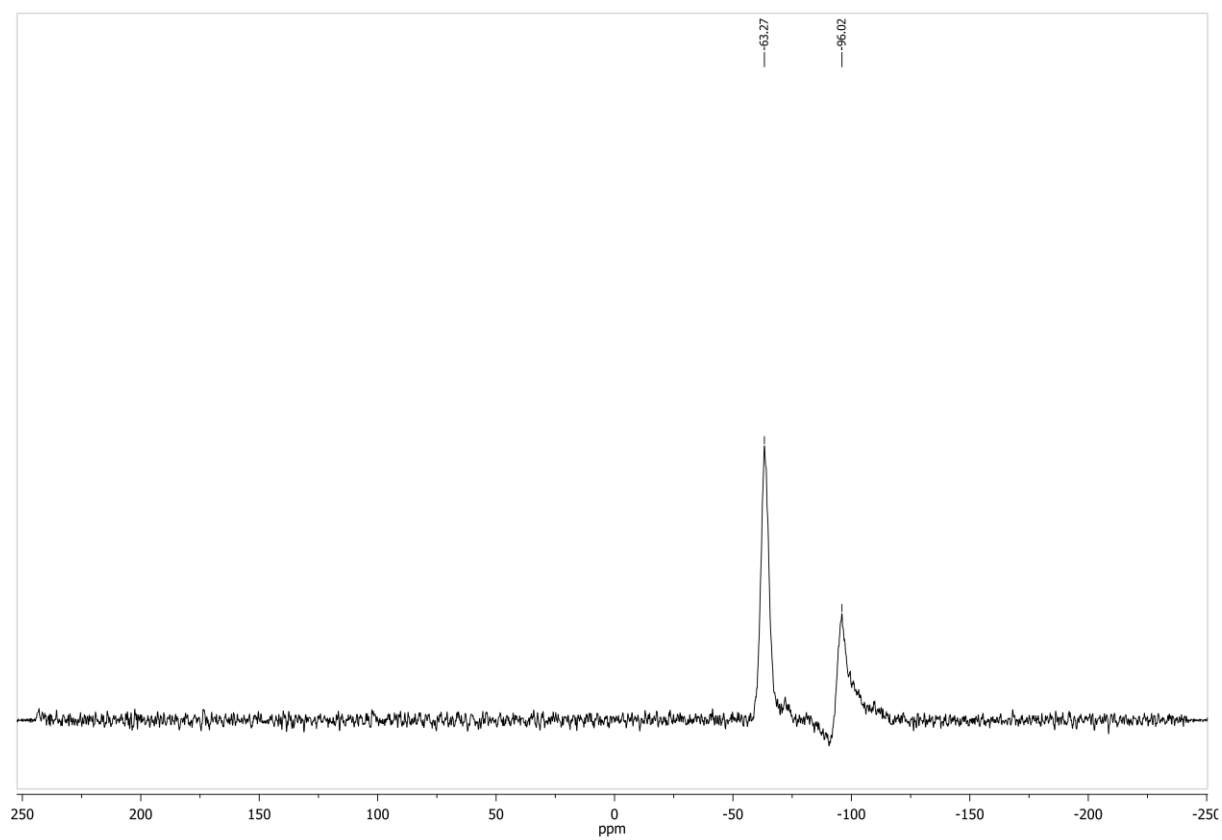

**Figure S2.**  $^{119}\text{Sn}$  NMR spectrum of compound **2·Cl** in  $\text{CDCl}_3$ .

**Mass spectrometry:** ESI(+)-MS measurements were carried out using a LTQ-FT Ultra from Thermo Fischer Scientific with syringe pump infusion method.

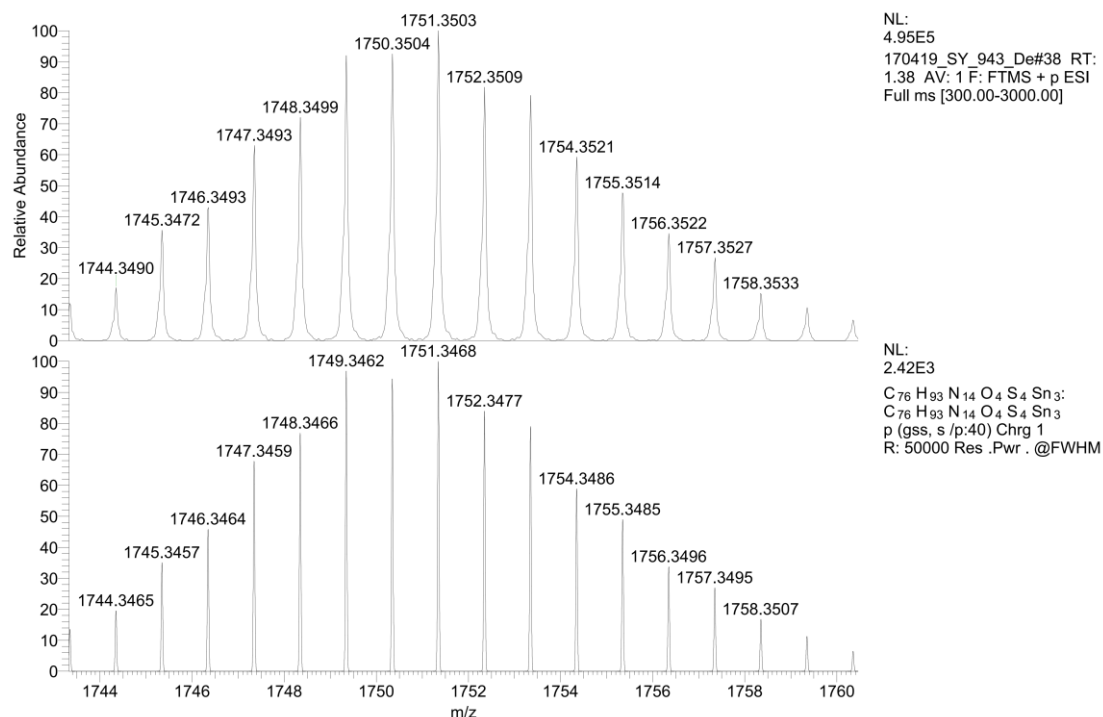

**Figure S3.** HRMS of the signal of  $1^+$  with the sum formula  $[C_{76}H_{93}N_{14}O_4S_4Sn_3]^+$ .

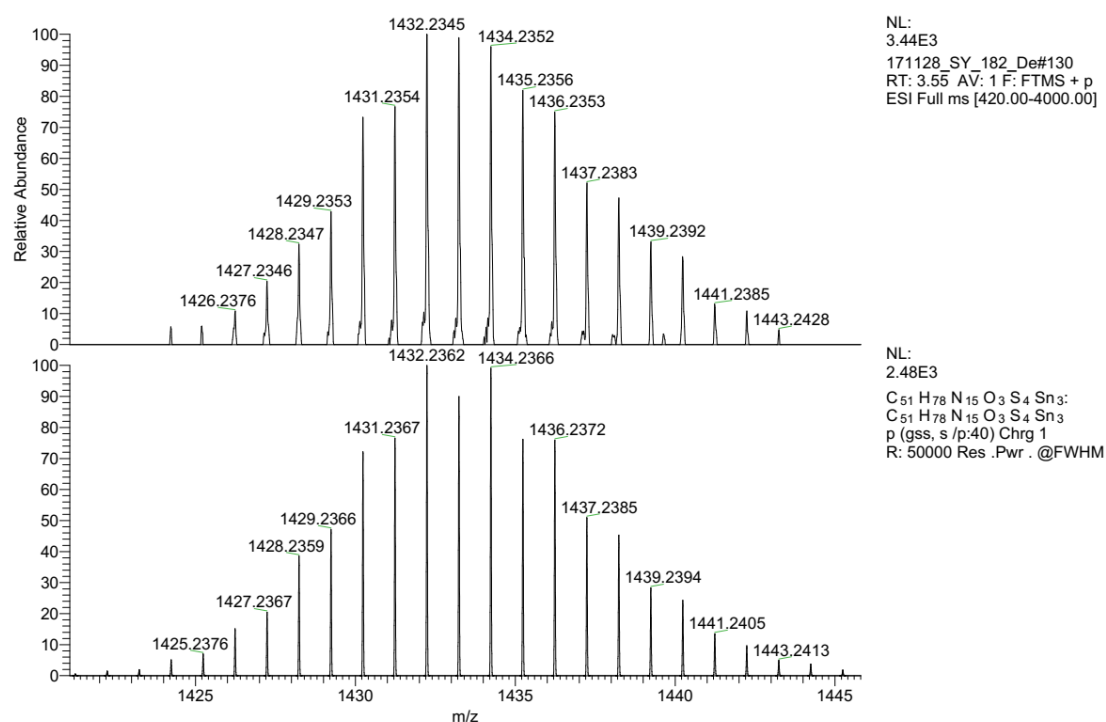

**Figure S4.** HRMS of the signal at 1432.2345 m/z corresponding to the sum formula  $[C_{51}H_{78}N_{15}O_3S_4Sn_3]^+$ .

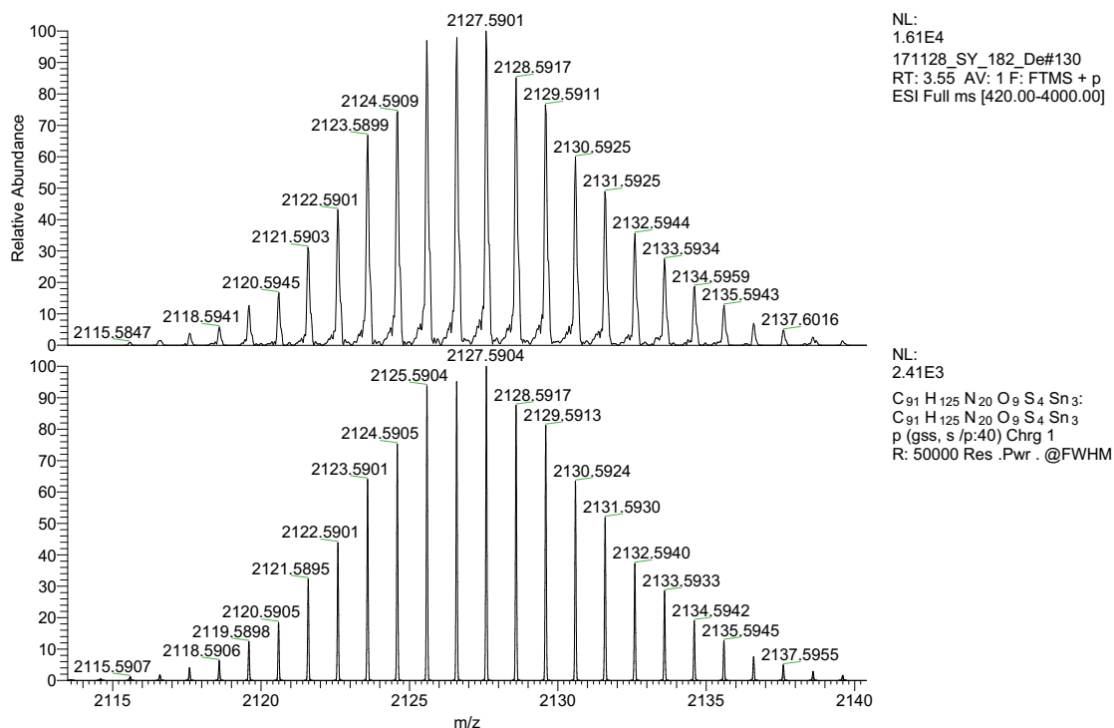

**Figure S5.** HRMS of the signal at 2127.5901 m/z corresponding to the sum formula [C<sub>91</sub>H<sub>125</sub>N<sub>20</sub>O<sub>9</sub>S<sub>4</sub>Sn<sub>3</sub>]<sup>+</sup>.

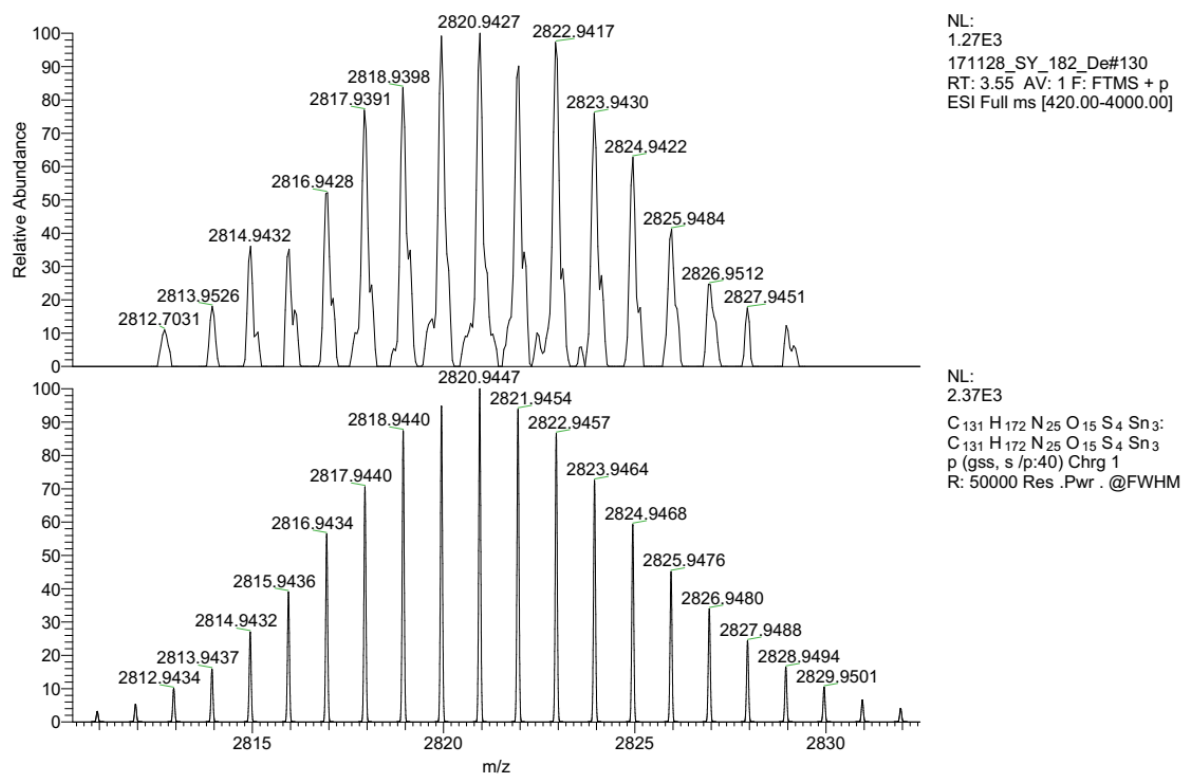

**Figure S6.** HRMS of the signal at 2820.9427 m/z corresponding to the sum formula [C<sub>131</sub>H<sub>172</sub>N<sub>25</sub>O<sub>15</sub>S<sub>4</sub>Sn<sub>3</sub>]<sup>+</sup>.



#### IV. Quantum Chemical Investigations

Density functional calculations were carried out with TURBOMOLE<sup>[1]</sup> using def2-TZVP basis sets<sup>[2]</sup> and the BP86 functional,<sup>[3]</sup> taking advantage of the resolution-of-the-identity method.<sup>[4]</sup> Starting geometries were obtained manually using the Z-matrix editor in the program MOLDEN,<sup>[5]</sup> starting from the known crystal structure of compound **D**.<sup>[6]</sup>

#### V. References

- [1] TURBOMOLE Version 7.3, TURBOMOLE GmbH 2018. TURBOMOLE is a development of University of Karlsruhe and Forschungszentrum Karlsruhe 1989–2007, TURBOMOLE GmbH since 2007.
- [2] F. Weigend and R. Ahlrichs, *Phys. Chem. Chem. Phys.*, 2005, **7**, 3297.
- [3] a) A. Becke, *Phys. Rev. A*, 1988, **38**, 3098; b) J. Perdew, *Phys. Rev. B*, 1986, **33**(12), 8822.
- [4] a) K. Eichkorn, O. Treutler, H. Öhm, M. Häser and R. Ahlrichs, *Chem. Phys. Lett.*, 1995, **240**, 283; b) K. Eichkorn, F. Weigend, O. Treutler and R. Ahlrichs, *Theor. Chem. Acc.*, 1997, **97**, 119.
- [5] G. Schaftenaar and J. H. Noordik, *J. Comput. Aided. Mol. Des.*, 2000, **14**, 123.
- [6] J.-P. Berndt, A. Engel, R. Hrdina, S. Dehnen and P. R. Schreiner, *Organometallics*, 2019, **38**, 329.
